# Supplementary material for: Altered Gut Microbiota in Korean Children with Autism Spectrum Disorders
Source: MDPI journal article supplement (doi:10.3390/nu13103300), 2021-09-22
Supplement: s1 [file s1]

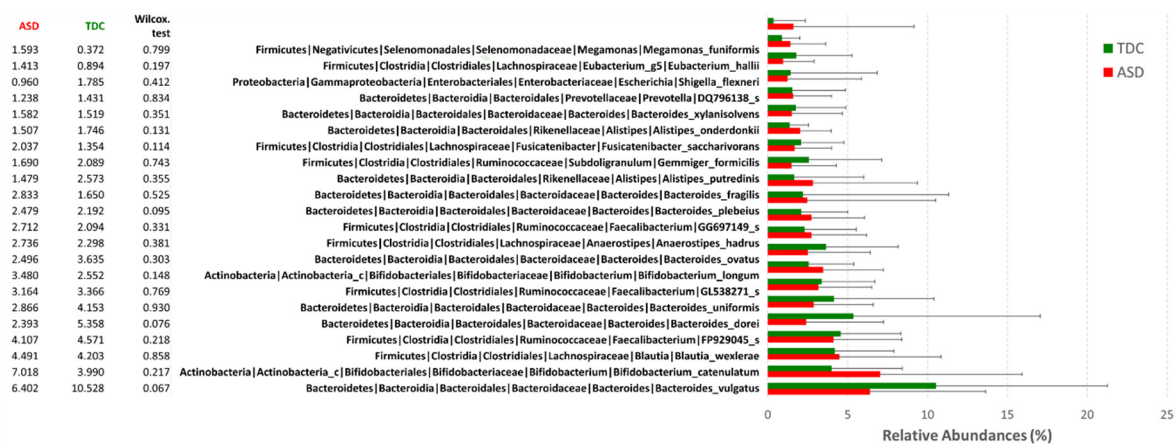

Supplementary Figure S1. Microbial profiles at the species level. The proportion of the bacterial composition was presented at a table. Error bars indicated standard deviation (S.D).

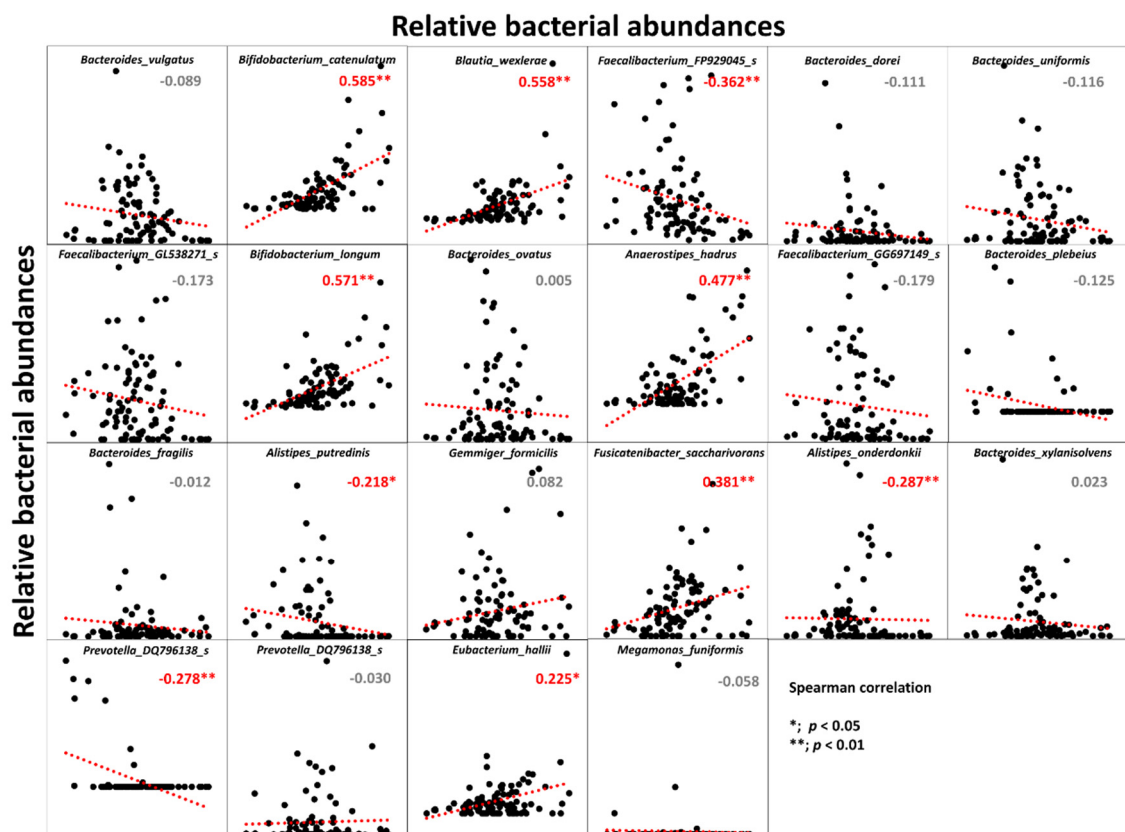

Supplementary Figure S2. Spearman correlation between the relative bacterial abundances and Principal component 1 (PC 1) of weighted UniFrac analysis. Asterisk indicates a significant correlation between relative bacterial abundances and PC 1 (\* $p < 0.05$ , \*\* $p < 0.01$ ).
